# Supplementary material for: Knockdown of mesenchymal stem cell-derived exosomal LOC100129516 suppresses the symptoms of atherosclerosis via upregulation of the PPARγ/LXRα/ABCA1 signaling pathway
Source: PubMed Central journal article supplement — Int J Mol Med. 2021 Oct 4;48(6):208. doi: 10.3892/ijmm.2021.5041 (PMC8510681; doi:10.3892/ijmm.2021.5041), 2021-10-04

Figure S1. LOC100129516 siRNA significantly inhibits the viability of ox-LDL-treated vascular smooth muscle cells. (A) Vascular smooth muscle cells were treated with ox-LDL, ox-LDL + siRNA-ctrl Exo, ox-LDL + si-LOC100129516 Exo or ox-LDL + si-LOC100129516. The viability of vascular smooth muscle cells was assessed using a Cell Counting Kit-8 assay. (B) THP-1 cells were transfected with siRNA-ctrl or si-LOC100129516. The apoptosis of THP-1 cells was assessed using flow cytometry. n=3. \*\*P<0.01 vs. control group; ##P<0.01 vs. ox-LDL group. siRNA, small interfering RNA; ox-LDL, oxidized low density lipoproteins; Exo, exosome; ctrl, control.

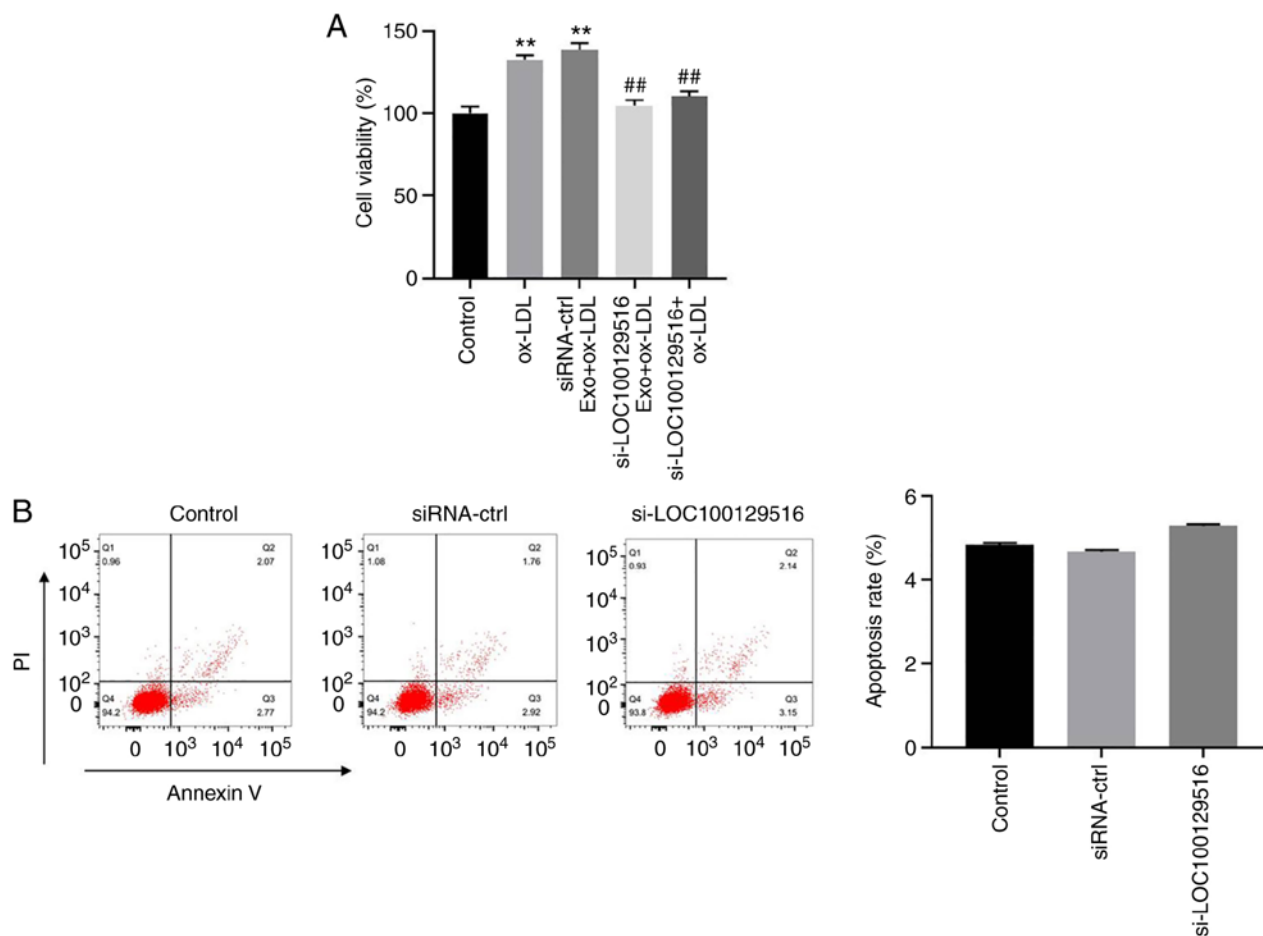

Supplement: Supplementary_Data.pdf [file Supplementary_Data.pdf]
